1 **APOBEC3B reporter myeloma cell lines identify DNA damage**

2 **response pathways leading to APOBEC3B expression**

3 Hiroyuki Yamazaki<sup>1</sup>, Kotaro Shirakawa<sup>1</sup>, Tadahiko Matsumoto<sup>1</sup>, Yasuhiro Kazuma<sup>1</sup>, Hiroyuki

4 Matsui<sup>1</sup>, Yoshihito Horisawa<sup>1</sup>, Emani Stanford<sup>1</sup>, Anamaria Daniela Sarca<sup>1</sup>, Ryutarō Shirakawa<sup>2</sup>,

5 Keisuke Shindo<sup>1</sup> and Akifumi Takaori-Kondo<sup>1\*</sup>

6

7 From the <sup>1</sup>Department of Hematology and Oncology, Graduate School of Medicine, Kyoto

8 University, Kyoto 606-8507, Japan, <sup>2</sup>Department of Molecular and Cellular Biology, Institute of

9 Development, Aging and Cancer, Tohoku University, Sendai 980-8575, Japan.

10

11 **\*Correspondence:**

12 Akifumi Takaori-Kondo, MD, PhD

13 Department of Hematology and Oncology, Graduate School of Medicine, Kyoto University

14 54 Shogoin Kawahara-cho, Sakyo-ku, Kyoto 606-8507, Japan

15 Telephone: +81-75-751-4964

16 Fax: +81-75-751-4963

17 E-mail: [atakaori@kuhp.kyoto-u.ac.jp](mailto:atakaori@kuhp.kyoto-u.ac.jp)

18

- 19 **Text word count: 3635 words**
- 20 **Abstract word count: 190 words**
- 21 **Number of figures: 4**
- 22 **Number of tables: 0 (Supplemental Table: 2)**
- 23 **Number of references: 69**

25 **Abstract**

26 Apolipoprotein B mRNA-editing enzyme catalytic polypeptide-like (APOBEC) DNA cytosine  
27 deaminase 3B (A3B) is a DNA editing enzyme which induces genomic DNA mutations in  
28 multiple myeloma and various other cancers. APOBEC family proteins are highly homologous  
29 so it is especially difficult to investigate the biology of A3B alone in cancer cells. To investigate  
30 A3B function in myeloma cells easily and comprehensively, we used CRISPR/Cas9 to generate  
31 A3B reporter cells that contain 3×FLAG tag and IRES-EGFP sequences integrated at the end of  
32 the A3B gene. These reporter cells stably express 3xFLAG tagged A3B and the reporter EGFP  
33 and this expression is enhanced under known stimuli, such as PMA. Conversely, shRNA  
34 knockdown of A3B decreased EGFP fluorescence and 3xFLAG tagged A3B protein levels. We  
35 screened a series of anticancer treatments using these cell lines and identified that most  
36 conventional therapies, such as antimetabolites or radiation, exacerbated endogenous A3B  
37 expression, but recent molecular targeting drugs, including bortezomib, lenalidomide and  
38 elotuzumab, did not. Furthermore, chemical inhibition of ATM, ATR and DNA-PK suppressed  
39 the EGFP expression upon treatment with antimetabolites. These results suggest that DNA  
40 damage response triggers A3B expression through ATM, ATR and DNA-PK signaling.

## 42 **Introduction**

43 The apolipoprotein B mRNA-editing enzyme catalytic polypeptide-like DNA cytosine  
44 deaminase 3 family (APOBEC3, A3) consists of seven proteins (A3A, A3B, A3C, A3D, A3F,  
45 A3G and A3H) that preferentially induce C to U mutations in single strand DNA. A3 proteins  
46 were originally identified as factors of the innate immunity due to their mutagenic activity on  
47 viral genomes, and have recently joined the growing list of key intrinsic mutagens that play a  
48 part in oncogenesis [1]. Evidence for A3 mutagenicity consists in the presence of their  
49 mutational signature in cancer genomes [2], in the effects observed when overexpressed in tumor  
50 tissues [3, 4], as well as in the correlation of APOBEC signature mutations with poor prognosis  
51 [5, 6]. Nevertheless, the precise biology of individual APOBEC3 proteins in cancer cells remains  
52 unknown. Due to the high structural homology of APOBEC3 family members, it is particularly  
53 difficult to obtain high-affinity- and high-specificity- antibodies against each APOBEC3 protein,  
54 which limits our capability to distinguish the precise role of each endogenous APOBEC3 during  
55 tumorigenesis.

56         Among APOBEC3s, we previously reported that endogenous A3B is overexpressed and  
57 seems to be the main source of deamination activity in most of the myeloma cell lines we  
58 examined [7]. Notably, high levels of A3B expression in tumor cells were an independent risk  
59 factor for overall survival in myeloma patients [7] as well as in other cancer patients [8-11].

60 However, the regulatory mechanisms that mediate A3B expression have not been well studied.  
61 To date, molecules including cell cycle pathway [12] and DNA damage response (DDR) [13, 14]  
62 factors and several transcription factors such as human papillomavirus E6/E7 [15, 16], NF- $\kappa$ B  
63 [17, 18], c-Maf [5] and B-Myb [19] were reported to enhance A3B expression. Nevertheless,  
64 how these factors mediate A3B expression and how A3B contributes to tumor progression and/or  
65 acquisition of chemoresistance in myeloma cells remains unclear. To investigate A3B-associated  
66 myeloma biology, we used the CRISPR/Cas9 system to introduce the 3 $\times$ FLAG tag and IRES-  
67 EGFP gene at the beginning of the 3' UTR of the A3B gene in three human myeloma cell lines.  
68 We utilized this reporter cell lines to screen for how A3B expression is affected by anticancer  
69 treatments. Overall, we found these reporter cell lines to be very useful for the comprehensive  
70 analysis of A3B biology.

71

## 72 **Materials and Methods**

### 73 **Human cell lines and culture**

74 Three human myeloma cell lines, U266, RPMI8226 and AMO1 cells were maintained in  
75 RPMI1640 (Nacalai) containing 10% FBS and 1% PSG (Invitrogen). HEK293T and Lenti-X  
76 cells were maintained in DMEM (Nacalai) containing 10% FBS and 1% PSG (Invitrogen).

77

## 78 **sgRNA design and construction of A3B reporter donor DNA**

79 To design the single-guide RNA (sgRNA) target sites, the mRNA sequence of APOBEC3B  
80 (APOBEC3B Homo sapiens chromosome 22, GRCh38 Primary Assembly mRNA variant1, Fig.  
81 1A) was imported into CRISPRdirect [20]. After a target site was determined, annealed oligos  
82 (Supplemental Table 1) were inserted into pSpCas9(BB)–2A–Puro (PX459) V2.0 (Addgene,  
83 #62988) using the *BbsI* (New England Biolabs) cloning site, or into lentiCRISPR ver.2  
84 (Addgene, #52961) using the *BsmBI* (New England Biolabs) cloning site as previously described  
85 [21, 22]. For the construction of the donor DNA plasmid (Fig. 1B), the right homology arm, the  
86 modified cassette including 3×FLAG–IRES–EGFP gene and the left homology arm were PCR-  
87 amplified using the KOD FX Neo (ToYoBo). Each PCR primer pair contained around 15 bp  
88 overlaps. All the amplicons were cloned into a lentiviral plasmid pCSII–CMV–MCS (RIKEN,  
89 RDB04377) by using the In-Fusion HD Cloning Kit (TaKaRa), to produce the pCSII–  
90 CMV:A3B–3×FLAG–IRES–EGFP donor DNA plasmid.

91

## 92 **Validation of sgRNA targeting efficiency**

93 293T cells were transfected with pSpCas9(BB)–2A–Puro:sgRNA #4 (0.5 µg) using the FuGENE  
94 HD Transfection Reagent (Promega). Two days after transfection, 293T cells were harvested and  
95 their genomic DNA extracted using the QuickGene DNA whole blood kit S (KURABO). The

96 targeted region was PCR-amplified from the genomic DNA using the targeting test primers  
97 (Supplemental Table 1). The PCR products (200 ng) were denatured and then re-annealed to  
98 form heteroduplex DNA. The hybridized DNA was digested with T7 endonuclease I (T7E1,  
99 New England Biolabs), and run on 2% agarose gel. Mutation frequency was calculated based on  
100 the band intensities, using Image J software, as previously described [23].

101

## 102 **Generation of A3B reporter cell lines**

103 For the U266 and AMO1 cell lines,  $5 \times 10^6$  cells were co-transfected with 5  $\mu$ g of pSpCas9(BB)-  
104 2A-Puro:sgRNA #4 plasmid and 5  $\mu$ g of pCSII-CMV:A3B-3 $\times$ FLAG-IRES-EGFP donor DNA  
105 plasmid using the Amaxa Nucleofector (Lonza) with nucleofection solution R, program X-001.

106 For the RPMI8226 cell line,  $5 \times 10^6$  cells were transduced by the lentiCRISPR ver.2:sgRNA #4  
107 viruses and the pCSII-CMV:A3B-3 $\times$ FLAG-IRES-EGFP donor DNA viruses, simultaneously.

108 These lentiviruses were produced by co-transfection of the packaging plasmid pVSVg  
109 (AddGene, #8454), psPAX2-D64V (AddGene, #63586) and lentiCRISPR ver.2:sgRNA #4  
110 plasmid, or pCSII-CMV:A3B-3 $\times$ FLAG-IRES-EGFP donor DNA plasmid, into Lenti-X cells.

111

## 112 **Flow cytometry analysis**

113 Myeloma cells were stained with DRAQ7 (Biostatus) to mark dead cells, then were read on BD  
114 FACS Calibur or BD FACS Lyric (Becton-Dickinson Biosciences). To isolate A3B reporter cell  
115 lines, EGFP positive cells were sorted using a FACS Aria III cell sorter (Becton-Dickinson  
116 Biosciences) at seven days after transfection or transduction. Data were analyzed using the  
117 software FCSalyzer ver. 0.9.15-alpha. (<https://sourceforge.net/projects/fcsalyzer/>).

118

### 119 **Genotyping of A3B reporter cell clones**

120 Single clones were isolated from the sorted EGFP-positive cells of the three myeloma cell lines  
121 by limiting dilution. These clones were then PCR-genotyped using 2 pairs of the target  
122 confirmation primers, forward #a and reverse #b, and forward #c and reverse #b. To confirm the  
123 full sequence of A3B-3×FLAG-IRES-EGFP mRNA from the established cell line,  
124 complementary DNA (cDNA) was synthesized as described below, and was PCR-amplified by  
125 KOD FX Neo (ToYoBo) using a pair of primers, forward #d and reverse #e. The PCR products  
126 were sequenced using the 3130xl Genetic Analyzer (Applied Biosystems). All primers for PCR  
127 are listed in Supplemental Table 1.

128

### 129 **Immunoblot analysis**



130 Whole cell lysates from  $5.0 \times 10^6$  cells were prepared using SDS-based buffer (5 mM EDTA, 1%  
131 SDS) supplemented with Protease inhibitor cocktail (Roche) and PhosSTOP EASY (Roche),  
132 were mixed with an equal volume of twofold concentrated sample buffer (Bio-Rad Laboratories)  
133 containing  $\beta$ -mercaptoethanol (Nacalai Tesque), and were treated for 5 min at 100°C.

134 Immunoblot analysis was performed as described previously using a mouse anti-FLAG antibody  
135 (Millipore, clone JBW301) or a mouse anti- $\alpha$ -tubulin monoclonal antibody (AA13, Funakoshi).

136

### 137 **Immunofluorescence assays**

138 Cells were air-dried and fixed in 4% paraformaldehyde in phosphate-buffered saline (PBS) for  
139 20 minutes on glass slides using Shandon cytospin 2 (THERMO FISHER SCIENTIFIC). Fixed  
140 cells were permeabilized, reduced and denatured for 30 minutes in PBS buffer containing 0.5%  
141 SDS, 5%  $\beta$ -mercaptoethanol and 10% FBS. Then, cells were washed three times with PBS  
142 containing 4% FBS and 0.1% Triton X-100 (PFT buffer) [24], and incubated with a purified  
143 mouse anti-FLAG antibody for 1 hour. Subsequently, cells were incubated with a goat anti-  
144 mouse IgG (H+L)-Alexa Flour® 594 preadsorbed antibody (Abcam, ab150120) for 30 min in the  
145 dark. All antibodies were diluted with 3% BSA and 0.5% Tween in PBS. Then, the cells were  
146 stained with DAPI and were observed with a confocal laser scanning microscope (TCS-SP8,  
147 Leica).

148

149 **Knockdown experiments**

150 We constructed pSicoR-mCherry lentiviral vectors [25] expressing short-hairpin RNA (shRNA)

151 against A3B by inserting synthetic double-stranded oligonucleotides, as previously described [7]

152 (TRCN0000140546 [26], sense oligo, 5'-

153 TGCAAAGCAATGTGCTCCTGATCTCGAGATCAGGAGCACATTGCTTTGCTTTTTTC-

154 3', and antisense oligo, 5'-

155 TCGAGAAAAAAGCAAAGCAATGTGCTCCTGATCTCGAGATCAGGAGCACATTGCTT

156 TGCA-3'; TRCN0000139463, sense oligo, 5'-

157 TCCTGATGGATCCAGACACATTCTCGAGAATGTGTCTGGATCCATCAGGTTTTTTC-

158 3', and antisense oligo, 5'-

159 TCGAGAAAAAACCTGATGGATCCAGACACATTCTCGAGAATGTGTCTGGATCCATCA

160 GGA-3') into the cloning site. For non-target shRNA, we used two constructs that were cloned

161 as scrambled sequences (control [27], sense oligo, 5'-

162 TGTCAAGTCTCACTTGCGTCTTCAAGAGAGACGCAAGTGAGACTTGACTTTTTTTC-3',

163 antisense oligo, 5'-

164 TCGAGAAAAAAGTCAAGTCTCACTTGCGTCTCTCTTGAAGACGCAAGTGAGACTTGA

165 CA-3'; control-2 [28], sense oligo, 5'-

166 TATCTCGCTTGGGCGAGAGTAAGCTCGAGCTTACTCTCGCCCAAGCGAGATTTTTTT

167 C-3', antisense oligo, 5'-

168 TCGAGAAAAAATCTCGCTTGGGCGAGAGTAAGCTCGAGCTTACTCTCGCCCAAGC

169 GAGATA). The lentivirus was produced by co-transfection of Trans-Lentiviral packaging

170 plasmid mix (GE Dharmacon) and pSicoR-mCherry into Lenti-X cells.

171

## 172 **Quantitative RT-PCR**

173 Total RNA was extracted from cell lines using the High Pure RNA isolation kit (Roche). cDNA

174 was synthesized using the PrimeScriptR II 1<sup>st</sup> strand cDNA Synthesis Kit (Takara) by random

175 primer and oligo dT primer mixture. Real-time PCR was performed using the Thunderbird

176 SYBR qPCR Mix (ToYoBo). Target gene expression levels were normalized by endogenous

177 expression levels of HPRT1. All primers for real-time PCR are listed in Supplemental Table 1.

178

## 179 **Anticancer treatment screening**

180 To examine the effects of chemotherapeutic agents on A3B expression, the A3B reporter cells

181 were cultured for two days at a concentration of  $2 \times 10^5$  cells/well/1.5 mL medium in 12-well

182 plates and treated with phorbol 12-myristate 13-acetate (PMA, Sigma), melphalan (MEL,

183 Wako), cisplatin (CDDP, Nihon-kayaku), mitomycin C (MMC, Funakoshi), N-desacetyl-N-

184 methylocolchicine (COL, KaryoMAX Colcemid Solution in PBS, Thermo Fisher), camptothecin  
185 (CPT-11, TopoGEN), etoposide (VP-16, TREVIGEN), cytosine-1-B-D(+)-arabinofuranoside  
186 (Ara-C, Wako), gemcitabine hydrochloride (GEM, Sigma), hydroxyurea (HU, Tokyo chemical  
187 industry), aphidicolin (APH, Wako), bortezomib (BOR, Funakoshi), lenalidomide (LEN, Sigma),  
188 elotuzumab (ELO, Bristol-Myers Squibb), human IFN- $\alpha$  (Sumiferon, Dainippon Sumitomo  
189 Pharma) and olaparib (Funakoshi) at several concentrations as described in the main text. These  
190 chemotherapeutics were dissolved in 100 % dimethyl sulfoxide (Nacalai Tesque) with the  
191 exception of COL, HU, ELO and INF- $\alpha$  which were dissolved in distilled water. To examine the  
192 effects of radiation or UV on A3B expression, the cells were exposed to gamma irradiation using  
193 a Cs-137 Gamma Cell or to UVC using a FUNA UV Crosslinker, FS-800 (Funakoshi). To  
194 examine the effects of kinase inhibitors on A3B regulation, KU-55933 (Selleck), VE-821  
195 (Selleck), NU-7026 (Selleck) and CGK733 (Calbiochem) were added 2 hours prior to  
196 antimetabolite treatment.

197

## 198 **Statistical analysis**

199 Mann-Whitney U test and Welch's t test were calculated to evaluate the differences in  
200 continuous variables between two groups in quantitative RT-PCR analysis and in flow cytometry

201 analysis, respectively, by using the EZR software (version 3.0.2, Saitama Medical Center, Jichi  
202 Medical University) [29].

203

## 204 **Results**

### 205 **CRISPR design**

206 We first designed candidates for sgRNA target sites in *A3B*, excluding introns, using the web  
207 based tool, CRISPRdirect [20]. There are only four highly specific candidates for *A3B* (Fig. 1A  
208 and Supplemental Table 2) mainly due to high homology among APOBEC3 family genes. In  
209 order to insert the 3×FLAG sequence into *A3B* with a minimal off-target effect, we selected  
210 sgRNA #4 (Fig.1A). We detected endogenous *A3B* overexpression in U266, RPMI8266 and  
211 AMO1[7] and used the pSpCas9(BB)–2A–Puro plasmid and the lentiCRISPR ver.2 plasmid to  
212 transduce CRISPR targeting *APOBEC3B* loci in these cell lines. We also used a donor DNA  
213 template to introduce the 3×FLAG and IRES-EGFP reporter sequences at the end of the coding  
214 region, while removing the stop codon (Figs. 1B and 1C). The 3×FLAG–IRES–EGFP cassette  
215 was located adjacent to the beginning of 3' UTR, and intron 7 was removed to avoid partial gene  
216 editing. Usually, the PAM sequence (NGG) in the donor DNA template must be mutated to  
217 prevent cutting by cas9, however, in our case, any mutation of PAM would lead to alteration of  
218 the *A3B* protein sequence. Instead, we designed six silent mutations within the target site to

219 inhibit efficient sgRNA binding: the host genomic sequence of sgRNA #4,  
220 ‘ctgGGACACCTTTGTGTACCGCCAGGgat’, was altered to  
221 ‘ctgGGACACGTTCTGTCTATCGACAAGgat’, in the donor DNA template sequence. Finally,  
222 the complete donor DNA template sequence was inserted into the pCSII–CMV–MCS plasmid in  
223 the opposite direction of the CMV promoter of the parental vector (Fig. 1C), so that cells in  
224 which the donor DNA vector is present merely transiently would not express *EGFP* and only  
225 cells which had their genome successfully engineered would emit EGFP fluorescent signals.

226

### 227 **CRISPR guided 3×FLAG–IRES–EGFP insertion in *A3B* locus**

228 To test the targeting efficiency of the sgRNA, we transfected pSpCas9(BB)–2A–Puro:sgRNA #4  
229 plasmid into 293T cells. Transfection efficiency was 15.2% (T7E1 assay, Fig. 2A), therefore, we  
230 proceeded to co-transfect/co-transduce Cas9, the sgRNA #4 expressing vector and donor DNA  
231 vector into U266, RPMI8226 and AMO1 cell lines. As expected, the efficiency of genome  
232 editing in myeloma cells was quite low, but we successfully enriched EGFP positive cells by cell  
233 sorting (Fig. 2B). Single clones were isolated by limiting dilution from each cell line and  
234 genotyped. Finally, we established four knock-in cell lines from these single clones: U266<sup>A3B–</sup>  
235 <sup>3×FLAG–IRES–EGFP</sup> #1 and #2 (U266 KI #1 and #2), RPMI8226<sup>A3B–3×FLAG–IRES–EGFP</sup> (RPMI8226 KI),  
236 and AMO1<sup>A3B–3×FLAG–IRES–EGFP</sup> (AMO1 KI). As indicated in Fig. 2C, the two genotype patterns

237 suggest that the A3B-3×FLAG-IRES-EGFP cassette was correctly integrated at the target site in  
238 these cell lines. Of note, U266 KI#2 lost both wild type alleles of *A3B* (Fig. 2C). To confirm the  
239 mRNA sequence of A3B-3×FLAG-IRES-EGFP, we PCR-amplified the full length of the  
240 cDNA derived from each cell line (Fig. 2D) and performed Sanger sequencing analysis. As  
241 desired, all the engineered cell lines possessed correct A3B-3×FLAG sequences, with the  
242 exception of the intended 6 silent mutations in the sgRNA target site and SNPs in the  
243 unmanipulated region (Fig. 2E). According to flow cytometry analysis, the intensity of the  
244 fluorescent signal increased in the order of U266 KI #1, RPMI8226 KI and AMO1 KI, which is  
245 consistent with their A3B expression levels in a previous report [7]. U266 KI #2 exhibited  
246 around two times stronger fluorescence than U266 KI #1, indicating that the 3×FLAG-IRES-  
247 EGFP gene was integrated homozygously in U266 KI #2 and heterozygously in U266 KI #1.  
248 According to the results of flow cytometry and PCR-genotyping (Fig. 2C), RPMI8226 KI and  
249 AMO1 KI contain a single allele of the 3×FLAG-IRES-EGFP gene. Immunoblot analysis also  
250 confirmed that all the cell lines produced A3B-3×FLAG proteins of the predicted size (Fig. 2G).  
251 Immunofluorescent analysis of the subcellular localization of A3B-3×FLAG proteins showed a  
252 dominant localization in the nucleoplasm (Fig. 2H), which is identical with that of intact A3B  
253 proteins [7].

254

255 **The established A3B–3×FLAG–IRES–EGFP knock-in cell lines work as A3B reporters**

256 To verify the feasibility of the established cell lines as A3B reporters, we first transduced  
257 RPMI8226 KI and AMO KI cells with lentiviral shRNA against A3B together with an EF1 $\alpha$ -  
258 driven mCherry fluorescent marker. When A3B mRNA was efficiently depleted (Fig. 3A), A3B–  
259 3×FLAG protein levels decreased as expected (Fig. 3B). Similarly, EGFP fluorescent intensity  
260 decreased in mCherry positive, shRNA transduced cells, compared with mCherry negative,  
261 shRNA untransduced cells (Fig. 3C and 3D). Next, we treated U266 KI #1, RPMI8226 KI and  
262 AMO1 KI cells with PMA, a PKC activator, which is known to upregulate A3B expression via  
263 the NF- $\kappa$ B pathway [17, 18]. A quantitative RT-PCR analysis confirmed the enhancement of  
264 A3B mRNA levels for each cell line (Fig. 3E). Consistently, immunoblot analysis detects  
265 increases of A3B–3×FLAG proteins (Fig. 3F), and flow cytometry analysis detects peak shifts  
266 and increases of mean fluorescent intensity (MFI) for each cell line (Fig. 3G and 3H). Based on  
267 the above results, we conclude that these established cell lines properly work as A3B reporters.

268

269 **DDR upregulates A3B expression via all the DDR-PIKK pathways in myeloma cells**

270 Because the established A3B reporter cell lines provide an easy way to evaluate the alteration of  
271 A3B expression by simply performing flow cytometry analysis, we investigated which of the  
272 current clinically approved myeloma treatments affect A3B expression. Interestingly, most



273 conventional anticancer treatments which induce DNA interstrand cross-links (e.g., CDDP, MEL  
274 and MMC), microtubule inhibition (e.g., COL), topoisomerase inhibition (e.g., CPT-11 and VP-  
275 16), DNA synthesis inhibition (e.g., Ara-C, GEM, HU and aphidicolin) or DNA double-strand  
276 breaks (e.g., radiation), exacerbated endogenous A3B overexpression (Fig. 4A and 4B).  
277 Treatment with olaparib alone, a Poly(ADP-ribose) polymerase (PARP) inhibitor, which is  
278 known to induce SSBs which are degraded to DSBs during replication [30], also enhanced A3B  
279 expression (Fig. 4C). On the other hand, the proteasome inhibitor (i.e., BOR), the  
280 immunomodulatory drug (i.e., LEN), the non-agonistic antibody drug (i.e., ELO) and INF- $\alpha$  did  
281 not enhance A3B expression levels (Fig.4A). These results intimate that DNA toxic stimulation  
282 upregulates A3B expression through DDR and following activation of DDR associated  
283 phosphatidylinositol 3' kinase-related kinases (DDR-PIKKs) [31] including ataxia telangiectasia  
284 and Rad3-related (ATR), and ataxia telangiectasia-mutated (ATM), DNA-dependent protein  
285 kinase (DNA-PK). Chemical inhibition of DDR-PIKKs by VE-821 for ATR, or NU-7026 for  
286 DNA-PK, suppressed EGFP increase upon antimetabolites treatment (Fig. 4D and 4E).  
287 Moreover, various combinations of PIKK inhibitors, including KU-55933, an ATM inhibitor,  
288 exhibited a synergistic effect of preventing A3B exacerbation upon antimetabolite stimulation  
289 (Fig.4D and 4E). Notably, pretreatment with CGK733 alone, which was first reported as an  
290 ATM/ATR inhibitor [32], almost completely blocked the antimetabolite effect on A3B

291 expression in the three cell lines (Fig. 4F). These results suggest that all the DDR related  
292 pathways are involved in A3B regulation in myeloma cells.

293

## 294 **Discussion**

295 In the present report, we successfully established four A3B reporter cell lines derived from three  
296 human myeloma cell lines, U266, RPMI8226 and AMO1. These cell lines express EGFP  
297 proteins with attribution to A3B expression, regulated by the same  
298 transcriptional/posttranscriptional mechanisms due to identical promoter, the 3'-UTR and the 5'-  
299 UTR to *A3B*. Due to these particularities, these cell lines are a very useful tool for investigating  
300 A3B regulation in a high-throughput screening format by flow cytometry analysis, which will  
301 allow for the development of specific A3B suppressors. There are several similar reports of other  
302 gene-edited reporter cell lines used for comprehensively studying the transcriptional regulation  
303 of the targeted gene [33-37]. In the case of A3B, most previous reports have studied A3B protein  
304 function using exogenous overexpression by transient transfection in a limited number of cell  
305 lines including non-human cells [16, 26, 38-44], mainly due to the difficulty of obtaining specific  
306 anti-A3B antibodies. In contrast, the commercially available and certified anti-FLAG antibody  
307 can be used to explore the A3B protein in the established A3B reporter cell lines described here.  
308 That is to say, these cell lines have the potential to clarify natural protein-protein and/or DNA-

309 protein interaction of A3B specifically, in tumor cells. In addition, the A3B reporter system can  
310 be integrated into other A3B-overexpressing cell lines by using the Cas9/sgRNA #4 expressing  
311 vector and pCSII-CMV:A3B-3×FLAG-IRES-EGFP donor DNA vector described here.

312         According to our pilot screening, most of the conventional anticancer treatments  
313 exacerbated A3B overexpression in myeloma cells (Fig. 4A and 4B). These treatments seem to  
314 act through a common pathway: induction of DDR [45]. Specifically, HU, which inhibits the  
315 incorporation of nucleotides by interfering with the enzyme ribonucleotide reductase [46], and  
316 APH, which interferes with DNA replication by inhibiting DNA polymerases  $\alpha$ ,  $\epsilon$  and  $\delta$  [47], are  
317 both commonly used to induce replication fork stalling that leads to ATR/ATM activation. These  
318 antimetabolites are also known to induce DSBs [48, 49]. CPT-11 covalently stabilizes the  
319 topoisomerase I-DNA cleavage complex by inhibiting the religation of SSBs [50], thereby  
320 increasing the number of SSBs and subsequent DSBs [51]. Meanwhile, VP-16 leads to increases  
321 in the levels of topoisomerase II-DNA covalent complexes resulting in the rapid induction of  
322 DSBs [52]. DNA interstrand cross-linkers form a number of adducts with DNA, and thereafter  
323 activate a wide variety of DNA repair pathways [53] such as nucleotide excision repair (NER)  
324 [54, 55], homology-directed repair (HDR) [56] and mismatch repair (MMR) [57]. DNA  
325 interstrand cross-links are also known to be sensed by non-histone chromosomal high-mobility  
326 group box proteins 1 and 2 (HMGB1 and HMGB2), which affect cell cycle events and

327 subsequently induce apoptosis [58]. Colcemid also has the potential to induce DSBs [59, 60].  
328 Although UV exposure dominantly produces cyclobutane pyrimidine dimers (CPDs) and 6-4  
329 photoproducts (6-4PP) but not DSBs directly, it activates ATR by SSBs and ATM by DSBs in a  
330 NER-dependent manner [61]. On the other hand, bortezomib and lenalidomide did not enhance  
331 A3B overexpression (Fig. 4A). We cannot exclude the possibility that these drugs can directly  
332 cause DSBs, however, there are few reports of DNA damage induced by a single treatment with  
333 bortezomib or lenalidomide.

334         The upregulation of A3B expression induced by DNA damage was suppressed by DDR-  
335 PIKK inhibitors, consistent with a previous report in breast cancer [13]. Under single-inhibition  
336 of each DDR-PIKK pathway, the DNA-PK inhibitor (NU-7026) suppressed A3B elevation the  
337 strongest. Kanu et al. reported that inhibiting ATR, and to a lesser extent ATM, reduced the  
338 hydroxyurea-induced A3B activation, and concluded that DNA replication stress activates  
339 transcription of A3B via an ATR/Chk1-dependent pathway in breast cancer [13]. Thus, the  
340 dependency of A3B regulation on each DDR-PIKK pathway could vary among cancer cell types.  
341 On closer examination of the histograms in our study, EGFP signal curves from cells treated with  
342 NU-7026 had two peaks in contrast to those treated with VE-821 which had only one peak (Fig.  
343 4D), suggesting that DNA-PK inhibition completely blocked A3B upregulation in a certain  
344 population of cells, whereas ATR inhibition suppressed it in all cells. Considering the synergistic

345 effects of the combinations of DDR-PIKK inhibitors in our study (Fig. 4D and 4E), it seems that  
346 all the DDR-PIKK pathways are at least partly involved in A3B regulation in myeloma cells.  
347 This model is also supported by the redundancy between each DDR-PIKK pathway under DNA  
348 replication stress [62]. Interestingly, A3B induction by DDR was almost completely blocked by  
349 treatment with CGK733 alone. CGK733 was initially reported to inhibit both ATM and ATR  
350 kinase activities, however, its specificity is now considered controversial [63, 64]. Nonetheless,  
351 there seems to be no doubt that CGK733 targets at least partly a downstream factor of the  
352 ATM/ATR pathway [65, 66]. HMGB1 and Cdc7 were identified as new target kinase candidates  
353 of CGK733 [67]. Of note, proteasome inhibitors were reported to suppress DDR by inhibiting  
354 phosphorylation of DDR-PIKKs [68, 69]. This suppression effect could explain why bortezomib  
355 did not exacerbate A3B expression.

356 We previously reported that shRNA against A3B decreased the basal level of  $\gamma$ H2AX  
357 foci in myeloma cell lines, indicating that A3B induces constitutive DNA double-strand breaks,  
358 promoting DDR activation [7]. Therefore DDR-inducible treatments trigger a positive feedback  
359 loop for A3B expression, which may drive chemoresistant clone expansion during  
360 chemotherapy. To prevent disease progression and potentiate current therapy, conventional  
361 anticancer treatment coupled with a combination of DDR-PIKK inhibitors including a

362 proteasome inhibitor might not only have a synergistic cytotoxicity for tumor cells but also  
363 suppress the production of chemoresistant clones.

364

### 365 **Acknowledgments**

366 This work was partly supported by JSPS KAKENHI Grant numbers JP19H03502, 18H03992 for  
367 A.T.-K., JP19K07591 for K.S. and by AMED under Grant Number JP19ck0106250,  
368 JP19cm0106501 for A.T.-K.

369

370 **Competing Interests:** The authors declare no competing interests.

371

### 372 **Authorship Contributions**

373 H.Y., K.Shirakawa., and A.T.-K. conceived the study. H.Y. carried out experiments with help  
374 from R.S., T.M., A.D.S., W.M., Y.K., H.M., H.F., Y.H., E.S., K.Shirakawa., K.Shindo. H.Y.,  
375 K.Shirakawa., and A.T.-K. wrote the paper. All the authors reviewed and approved the  
376 manuscript.

377

### 378 **References**

379 1. Henderson S, Fenton T. APOBEC3 genes: retroviral restriction factors to cancer drivers.

- 380 Trends in molecular medicine. 2015;21(5):274-84.
- 381 2. Alexandrov LB, Nik-Zainal S, Wedge DC, Aparicio SA, Behjati S, Biankin AV, et al.  
382 Signatures of mutational processes in human cancer. *Nature*. 2013;500(7463):415-21.
- 383 3. Swanton C, McGranahan N, Starrett GJ, Harris RS. APOBEC Enzymes: Mutagenic Fuel for  
384 Cancer Evolution and Heterogeneity. *Cancer Discov*. 2015;5(7):704-12.
- 385 4. Gao J, Choudhry H, Cao W. Apolipoprotein B mRNA editing enzyme catalytic polypeptide-  
386 like family genes activation and regulation during tumorigenesis. *Cancer science*. 2018;109(8):2375-  
387 82.
- 388 5. Walker BA, Wardell CP, Murison A, Boyle EM, Begum DB, Dahir NM, et al. APOBEC family  
389 mutational signatures are associated with poor prognosis translocations in multiple myeloma. *Nat*  
390 *Commun*. 2015;6:6997.
- 391 6. Maura F, Petljak M, Lionetti M, Cifola I, Liang W, Pinatele E, et al. Biological and prognostic  
392 impact of APOBEC-induced mutations in the spectrum of plasma cell dyscrasias and multiple  
393 myeloma cell lines. *Leukemia*. 2018;32(4):1044-8.
- 394 7. Yamazaki H, Shirakawa K, Matsumoto T, Hirabayashi S, Murakawa Y, Kobayashi M, et al.  
395 Endogenous APOBEC3B Overexpression Constitutively Generates DNA Substitutions and Deletions  
396 in Myeloma Cells. *Scientific reports*. 2019;9(1).
- 397 8. Sieuwerts AM, Willis S, Burns MB, Look MP, Meijer-Van Gelder ME, Schlicker A, et al.  
398 Elevated APOBEC3B correlates with poor outcomes for estrogen-receptor-positive breast cancers.  
399 *Hormones & cancer*. 2014;5(6):405-13.
- 400 9. Law EK, Sieuwerts AM, LaPara K, Leonard B, Starrett GJ, Molan AM, et al. The DNA  
401 cytosine deaminase APOBEC3B promotes tamoxifen resistance in ER-positive breast cancer. *Science*  
402 *advances*. 2016;2(10):e1601737.
- 403 10. Yan S, He F, Gao B, Wu H, Li M, Huang L, et al. Increased APOBEC3B Predicts Worse  
404 Outcomes in Lung Cancer: A Comprehensive Retrospective Study. *J Cancer*. 2016;7(6):618-25.
- 405 11. Du Y, Tao X, Wu J, Yu H, Yu Y, Zhao H. APOBEC3B up-regulation independently predicts  
406 ovarian cancer prognosis: a cohort study. *Cancer Cell Int*. 2018;18:78.
- 407 12. Ng JCF, Quist J, Grigoriadis A, Malim MH, Fraternali F. Pan-cancer transcriptomic analysis  
408 dissects immune and proliferative functions of APOBEC3 cytidine deaminases. *Nucleic acids research*.  
409 2019.
- 410 13. Kanu N, Cerone MA, Goh G, Zalmas LP, Bartkova J, Dietzen M, et al. DNA replication stress  
411 mediates APOBEC3 family mutagenesis in breast cancer. *Genome biology*. 2016;17(1):185.
- 412 14. Shimizu A, Fujimori H, Minakawa Y, Matsuno Y, Hyodo M, Murakami Y, et al. Onset of  
413 deaminase APOBEC3B induction in response to DNA double-strand breaks. *Biochem Biophys Rep*.  
414 2018;16:115-21.

- 415 15. Vieira VC, Leonard B, White EA, Starrett GJ, Temiz NA, Lorenz LD, et al. Human  
416 papillomavirus E6 triggers upregulation of the antiviral and cancer genomic DNA deaminase  
417 APOBEC3B. *mBio*. 2014;5(6).
- 418 16. Mori S, Takeuchi T, Ishii Y, Kukimoto I. Identification of APOBEC3B promoter elements  
419 responsible for activation by human papillomavirus type 16 E6. *Biochem Biophys Res Commun*.  
420 2015;460(3):555-60.
- 421 17. Leonard B, McCann JL, Starrett GJ, Kosyakovsky L, Luengas EM, Molan AM, et al. The  
422 PKC/NF-kappaB signaling pathway induces APOBEC3B expression in multiple human cancers.  
423 *Cancer Res*. 2015;75(21):4538-47.
- 424 18. Maruyama W, Shirakawa K, Matsui H, Matsumoto T, Yamazaki H, Sarca AD, et al. Classical  
425 NF-kappaB pathway is responsible for APOBEC3B expression in cancer cells. *Biochem Biophys Res*  
426 *Commun*. 2016;478(3):1466-71.
- 427 19. Chou WC, Chen WT, Hsiung CN, Hu LY, Yu JC, Hsu HM, et al. B-Myb Induces APOBEC3B  
428 Expression Leading to Somatic Mutation in Multiple Cancers. *Scientific reports*. 2017;7:44089.
- 429 20. Naito Y, Hino K, Bono H, Ui-Tei K. CRISPRdirect: software for designing CRISPR/Cas guide  
430 RNA with reduced off-target sites. *Bioinformatics (Oxford, England)*. 2015;31(7):1120-3.
- 431 21. Ran FA, Hsu PD, Wright J, Agarwala V, Scott DA, Zhang F. Genome engineering using the  
432 CRISPR-Cas9 system. *Nature protocols*. 2013;8(11):2281-308.
- 433 22. Shalem O, Sanjana NE, Hartenian E, Shi X, Scott DA, Mikkelsen T, et al. Genome-scale  
434 CRISPR-Cas9 knockout screening in human cells. *Science (New York, NY)*. 2014;343(6166):84-7.
- 435 23. Guschin DY, Waite AJ, Katibah GE, Miller JC, Holmes MC, Rebar EJ. A rapid and general  
436 assay for monitoring endogenous gene modification. *Methods in molecular biology (Clifton, NJ)*.  
437 2010;649:247-56.
- 438 24. Blum R, Pfeiffer F, Feick P, Nastainczyk W, Kohler B, Schafer KH, et al. Intracellular  
439 localization and in vivo trafficking of p24A and p23. *Journal of cell science*. 1999;112 ( Pt 4):537-48.
- 440 25. Salomonis N, Schlieve CR, Pereira L, Wahlquist C, Colas A, Zambon AC, et al. Alternative  
441 splicing regulates mouse embryonic stem cell pluripotency and differentiation. *Proc Natl Acad Sci U*  
442 *S A*. 2010;107(23):10514-9.
- 443 26. Burns MB, Lackey L, Carpenter MA, Rathore A, Land AM, Leonard B, et al. APOBEC3B is  
444 an enzymatic source of mutation in breast cancer. *Nature*. 2013;494(7437):366-70.
- 445 27. Hellman NE, Spector J, Robinson J, Zuo X, Saunier S, Antignac C, et al. Matrix  
446 metalloproteinase 13 (MMP13) and tissue inhibitor of matrix metalloproteinase 1 (TIMP1), regulated  
447 by the MAPK pathway, are both necessary for Madin-Darby canine kidney tubulogenesis. *The Journal*  
448 *of biological chemistry*. 2008;283(7):4272-82.
- 449 28. Eggenschwiler R, Loya K, Wu G, Sharma AD, Sgodda M, Zychlinski D, et al. Sustained



- 450 knockdown of a disease-causing gene in patient-specific induced pluripotent stem cells using lentiviral  
451 vector-based gene therapy. *Stem cells translational medicine*. 2013;2(9):641-54.
- 452 29. Kanda Y. Investigation of the freely available easy-to-use software 'EZR' for medical statistics.  
453 *Bone marrow transplantation*. 2013;48(3):452-8.
- 454 30. Li M, Yu X. The role of poly(ADP-ribosyl)ation in DNA damage response and cancer  
455 chemotherapy. *Oncogene*. 2015;34(26):3349-56.
- 456 31. Blackford AN, Jackson SP. ATM, ATR, and DNA-PK: The Trinity at the Heart of the DNA  
457 Damage Response. *Molecular cell*. 2017;66(6):801-17.
- 458 32. Won J, Kim M, Kim N, Ahn JH, Lee WG, Kim SS, et al. Small molecule-based reversible  
459 reprogramming of cellular lifespan. *Nature chemical biology*. 2006;2(7):369-74.
- 460 33. Cho YS, Kim BS, Sim CK, Kim I, Lee MS. Establishment of IL-7 Expression Reporter Human  
461 Cell Lines, and Their Feasibility for High-Throughput Screening of IL-7-Upregulating Chemicals.  
462 *PLoS One*. 2016;11(9):e0161899.
- 463 34. Shan L, Wang D, Mao Q, Xia H. Establishment of a DGKtheta Endogenous Promoter  
464 Luciferase Reporter HepG2 Cell Line for Studying the Transcriptional Regulation of DGKtheta Gene.  
465 *Applied biochemistry and biotechnology*. 2019;187(4):1344-55.
- 466 35. Li Z, Zhao J, Muhammad N, Wang D, Mao Q, Xia H. Establishment of a HEK293 cell line by  
467 CRISPR/Cas9-mediated luciferase knock-in to study transcriptional regulation of the human SREBP1  
468 gene. *Biotechnology letters*. 2018;40(11-12):1495-506.
- 469 36. Veach RA, Wilson MH. CRISPR/Cas9 engineering of a KIM-1 reporter human proximal  
470 tubule cell line. *PLoS One*. 2018;13(9):e0204487.
- 471 37. Li Y, Li S, Li Y, Xia H, Mao Q. Generation of a novel HEK293 luciferase reporter cell line by  
472 CRISPR/Cas9-mediated site-specific integration in the genome to explore the transcriptional  
473 regulation of the PGRN gene. *Bioengineered*. 2019;10(1):98-107.
- 474 38. Shinohara M, Io K, Shindo K, Matsui M, Sakamoto T, Tada K, et al. APOBEC3B can impair  
475 genomic stability by inducing base substitutions in genomic DNA in human cells. *Scientific reports*.  
476 2012;2:806.
- 477 39. Taylor BJ, Nik-Zainal S, Wu YL, Stebbings LA, Raine K, Campbell PJ, et al. DNA deaminases  
478 induce break-associated mutation showers with implication of APOBEC3B and 3A in breast cancer  
479 kataegis. *Elife*. 2013;2:e00534.
- 480 40. Akre MK, Starrett GJ, Quist JS, Temiz NA, Carpenter MA, Tutt AN, et al. Mutation  
481 Processes in 293-Based Clones Overexpressing the DNA Cytosine Deaminase APOBEC3B. *PLoS One*.  
482 2016;11(5):e0155391.
- 483 41. Hoopes JJ, Cortez LM, Mertz TM, Malc EP, Mieczkowski PA, Roberts SA. APOBEC3A and  
484 APOBEC3B Preferentially Deaminate the Lagging Strand Template during DNA Replication. *Cell*

- 485 Rep. 2016;14(6):1273-82.
- 486 42. Zhang W, Zhang X, Tian C, Wang T, Sarkis PT, Fang Y, et al. Cytidine deaminase  
487 APOBEC3B interacts with heterogeneous nuclear ribonucleoprotein K and suppresses hepatitis B  
488 virus expression. *Cellular microbiology*. 2008;10(1):112-21.
- 489 43. Xiao X, Yang H, Arutiunian V, Fang Y, Besse G, Morimoto C, et al. Structural determinants  
490 of APOBEC3B non-catalytic domain for molecular assembly and catalytic regulation. *Nucleic acids  
491 research*. 2017;45(12):7494-506.
- 492 44. Mishra N, Reddy KS, Timilsina U, Gaur D, Gaur R. Human APOBEC3B interacts with the  
493 heterogenous nuclear ribonucleoprotein A3 in cancer cells. *Journal of cellular biochemistry*.  
494 2018;119(8):6695-703.
- 495 45. Vesela E, Chroma K, Turi Z, Mistrik M. Common Chemical Inductors of Replication Stress:  
496 Focus on Cell-Based Studies. *Biomolecules*. 2017;7(1).
- 497 46. Krakoff IH, Brown NC, Reichard P. Inhibition of ribonucleoside diphosphate reductase by  
498 hydroxyurea. *Cancer Res*. 1968;28(8):1559-65.
- 499 47. Cheng CH, Kuchta RD. DNA polymerase epsilon: aphidicolin inhibition and the relationship  
500 between polymerase and exonuclease activity. *Biochemistry*. 1993;32(33):8568-74.
- 501 48. Saintigny Y, Delacote F, Vares G, Petitot F, Lambert S, Averbek D, et al. Characterization  
502 of homologous recombination induced by replication inhibition in mammalian cells. *The EMBO journal*.  
503 2001;20(14):3861-70.
- 504 49. Ewald B, Sampath D, Plunkett W. H2AX phosphorylation marks gemcitabine-induced stalled  
505 replication forks and their collapse upon S-phase checkpoint abrogation. *Molecular cancer  
506 therapeutics*. 2007;6(4):1239-48.
- 507 50. Staker BL, Hjerrild K, Feese MD, Behnke CA, Burgin AB, Jr., Stewart L. The mechanism of  
508 topoisomerase I poisoning by a camptothecin analog. *Proc Natl Acad Sci U S A*. 2002;99(24):15387-92.
- 509 51. Tuduri S, Crabbe L, Conti C, Tourriere H, Holtgreve-Grez H, Jauch A, et al. Topoisomerase  
510 I suppresses genomic instability by preventing interference between replication and transcription.  
511 *Nature cell biology*. 2009;11(11):1315-24.
- 512 52. Nitiss JL. Targeting DNA topoisomerase II in cancer chemotherapy. *Nature reviews Cancer*.  
513 2009;9(5):338-50.
- 514 53. Dronkert ML, Kanaar R. Repair of DNA interstrand cross-links. *Mutation research*.  
515 2001;486(4):217-47.
- 516 54. Koberle B, Masters JR, Hartley JA, Wood RD. Defective repair of cisplatin-induced DNA  
517 damage caused by reduced XPA protein in testicular germ cell tumours. *Current biology : CB*.  
518 1999;9(5):273-6.
- 519 55. Damsma GE, Alt A, Brueckner F, Carell T, Cramer P. Mechanism of transcriptional stalling

- 520 at cisplatin-damaged DNA. *Nat Struct Mol Biol.* 2007;14(12):1127-33.
- 521 56. Borst P, Rottenberg S, Jonkers J. How do real tumors become resistant to cisplatin? *Cell cycle*  
522 (Georgetown, Tex). 2008;7(10):1353-9.
- 523 57. Sedletska Y, Fourrier L, Malinge JM. Modulation of MutS ATP-dependent functional  
524 activities by DNA containing a cisplatin compound lesion (base damage and mismatch). *Journal of*  
525 *molecular biology.* 2007;369(1):27-40.
- 526 58. Brown R, Clugston C, Burns P, Edlin A, Vasey P, Vojtesek B, et al. Increased accumulation  
527 of p53 protein in cisplatin-resistant ovarian cell lines. *International journal of cancer.* 1993;55(4):678-  
528 84.
- 529 59. Hayashi MT, Cesare AJ, Fitzpatrick JA, Lazzerini-Denchi E, Karlseder J. A telomere-  
530 dependent DNA damage checkpoint induced by prolonged mitotic arrest. *Nat Struct Mol Biol.*  
531 2012;19(4):387-94.
- 532 60. Li H, Chang TW, Tsai YC, Chu SF, Wu YY, Tzang BS, et al. Colcemid inhibits the rejoining  
533 of the nucleotide excision repair of UVC-induced DNA damages in Chinese hamster ovary cells.  
534 *Mutation research.* 2005;588(2):118-28.
- 535 61. Wakasugi M, Sasaki T, Matsumoto M, Nagaoka M, Inoue K, Inobe M, et al. Nucleotide  
536 excision repair-dependent DNA double-strand break formation and ATM signaling activation in  
537 mammalian quiescent cells. *The Journal of biological chemistry.* 2014;289(41):28730-7.
- 538 62. Stiff T, Walker SA, Cerosaletti K, Goodarzi AA, Petermann E, Concannon P, et al. ATR-  
539 dependent phosphorylation and activation of ATM in response to UV treatment or replication fork  
540 stalling. *The EMBO journal.* 2006;25(24):5775-82.
- 541 63. Choi S, Toledo LI, Fernandez-Capetillo O, Bakkenist CJ. CGK733 does not inhibit ATM or  
542 ATR kinase activity in H460 human lung cancer cells. *DNA repair.* 2011;10(10):1000-1; author reply  
543 2.
- 544 64. Williams TM, Nyati S, Ross BD, Rehemtulla A. Molecular imaging of the ATM kinase activity.  
545 *Int J Radiat Oncol Biol Phys.* 2013;86(5):969-77.
- 546 65. Fallone F, Britton S, Nieto L, Salles B, Muller C. ATR controls cellular adaptation to hypoxia  
547 through positive regulation of hypoxia-inducible factor 1 (HIF-1) expression. *Oncogene.*  
548 2013;32(37):4387-96.
- 549 66. Bhattacharya S, Ray RM, Johnson LR. Role of polyamines in p53-dependent apoptosis of  
550 intestinal epithelial cells. *Cellular signalling.* 2009;21(4):509-22.
- 551 67. Suzuki T, Tsuzuku J, Hayashi A, Shiomi Y, Iwanari H, Mochizuki Y, et al. Inhibition of DNA  
552 damage-induced apoptosis through Cdc7-mediated stabilization of Tob. *The Journal of biological*  
553 *chemistry.* 2012;287(48):40256-65.
- 554 68. Sakasai R, Teraoka H, Tibbetts RS. Proteasome inhibition suppresses DNA-dependent

- 555 protein kinase activation caused by camptothecin. DNA repair. 2010;9(1):76-82.
- 556 69. Jacquemont C, Taniguchi T. Proteasome function is required for DNA damage response and
- 557 fanconi anemia pathway activation. Cancer Res. 2007;67(15):7395-405.
- 558

560 **Figure Legends**

561 **Figure 1.** Schema of APOBEC3B editing strategy. (A) Schema of A3B mRNA structure.

562 Triangles indicate highly-specific sgRNA target sites for *A3B*. Each intermittent arrow represents  
563 an exon (Ex). Areas in light gray show UTRs, those in dark gray show coding sequence regions  
564 (CDRs), and those in blue show catalytic domains. The mRNA of A3B isoforms (arrows in  
565 orange) as well as shA3B target sites (rectangles in yellow) are also indicated. (B) Schema of  
566 *A3B* in the host genome and in the donor DNA template. The donor DNA template contains six  
567 silent mutations in the sgRNA #4 target site, and intron 6 was removed. The 3×FLAG–IRES–  
568 EGFP sequence was inserted adjacent to the beginning of 3' UTR. (C) Schema of donor DNA  
569 plasmid, pCSII–CMV:A3B–3×FLAG–IRES–EGFP.

570

571 **Figure 2.** Establishment of A3B–3×FLAG–IRES–EGFP knock-in myeloma cell lines. (A) T7E1

572 assay of the sgRNA #4 site in 293T cells. Expected positions of uncleaved (606 bp) and cleaved

573 (532 bp and 74 bp) DNA bands by T7E1 are indicated with arrows. The mutation frequency is

574 also shown. (B) Flow cytometry of U266, RPMI8226 and AMO1 cells after introduction of the

575 donor DNA vector along with the CRISPR-Cas9 vector. EGFP positive cells are highlighted in

576 green and their proportions are indicated. (C) Genotyping PCR for genomic DNA from each

577 clone derived from a single cell among the enriched cells in (B). Each clone was genotyped by

578 two pairs of primers, Fw #a × Rv #b and Fw #c × Rv #b. Using the former primer pair, the  
579 expected size of the PCR amplicon is 2109 bp for the intact allele, and 3225 bp for the knock-in  
580 allele. Using the latter primer pair, the PCR amplicon (2349 bp) can be detected only if the  
581 knock-in allele is present. **(D)** Genotyping PCR for cDNA from each clone in (C). The PCR  
582 amplicon (2401 bp) can be detected only if the knock-in allele is present. **(E)** Sanger sequencing  
583 results for the full length of the edited A3B cDNA originated from the clones of 3×FLAG–  
584 IRES–EGFP knock-in cell lines. Schema of the A3B–3×FLAG–IRES–EGFP mRNA structure is  
585 also depicted, the same as in Fig.1B. **(F)** Histograms of EGFP intensity values from the  
586 3×FLAG–IRES–EGFP knock-in cell lines as determined by flow cytometry. **(G)** Immunoblot  
587 analysis of the 3×FLAG–IRES–EGFP knock-in cell lines.  $\alpha$ -tubulin was evaluated as internal  
588 control. **(H)** Immunofluorescence analysis of the 3×FLAG–IRES–EGFP knock-in clones using  
589 an anti-FLAG antibody. For U226 KI, clone U266 KI #1 was examined. Images were obtained  
590 by confocal fluorescence microscopy (magnification, x630).

591

592 **Figure 3.** A3B–3×FLAG–IRES–EGFP knock-in cells work as A3B reporters. **(A, B)** Real-time  
593 PCR (A) and immunoblotting (B) of A3B in RPMI8226 KI cells and AMO1 KI cells, which  
594 were transduced with lentiviral shRNA against A3B (two constructs: shA3B or shA3B-2) or  
595 control (two constructs: control or control-2). HPRT1 or  $\alpha$ -tubulin were evaluated as internal

596 controls. (C, D) Flow cytometry of RPMI8226 KI cells (C) and AMO1 KI cells (D) at 17 days  
597 after transduction with lentiviral shRNA against A3B or control. In the histogram representation,  
598 EGFP intensity was compared between mCherry positive cells (colored in red) and mCherry  
599 negative cells (colored in green). (E, F) Real-time PCR (E) and immunoblotting (F) of A3B in  
600 three A3B-3×FLAG-IRES-EGFP knock-in cell lines, which were treated with PMA (20 ng/mL)  
601 for 6 hours and 24 hours, respectively. (G) Representative result of EGFP intensity histogram of  
602 AMO1 KI cells, which were treated with PMA (20 ng/mL) for 2 days. (H) Bar graph of EGFP  
603 mean fluorescent intensity (MFI) of three A3B-3×FLAG-IRES-EGFP knock-in cell lines,  
604 which were treated with PMA (20 ng/mL) for 2 days.

605

606 **Figure 4.** DNA damage response exacerbates A3B overexpression via the DDR-PIKK pathways  
607 in myeloma cells. (A) A panel of EGFP mean fluorescent intensity (MFI) of three A3B-  
608 3×FLAG-IRES-EGFP knock-in cell lines with various anti-cancer treatment. The A3B reporter  
609 cells were incubated for 2 days with each anti-cancer reagent at the concentrations indicated on  
610 the horizontal axis. For the UVC exposure experiment, the A3B reporter cells were irradiated  
611 with a single dose at 2 days before flow cytometry analysis. Hash mark (#) represents  
612 unmeasurable state due to cytotoxicity. (B) Bar graph of EGFP MFI of AMO1 KI cells, which  
613 were exposed to a single dose of  $\gamma$ -ray at 2 days before flow cytometry analysis. (C) Bar graph of

614 EGFP MFI of three A3B-3×FLAG-IRES-EGFP knock-in cell lines with olaparib treatment (10  
615 μM) for 2 days. (D, E) Histograms (D) and bar graphs (E) of EGFP intensity values from AMO1  
616 KI cells, which were co-treated with HU (1μM) and DDR-PIKK inhibitors: KU-55933, 5 μM;  
617 VE-821, 5 μM; NU-7026, 2 μM; CGK733, 5 μM. Cells were incubated with the reagents for 2  
618 days and subsequently analyzed by flow cytometry. (F) Bar graph of EGFP MFI of three A3B-  
619 3×FLAG-IRES-EGFP knock-in cell lines treated with an antimetabolite (Ara-C, 50 μM; GEM,  
620 1 μM; HU, 1 μM) with or without CGK733 (5 μM) for 2 days.

621

622 **Supplemental Table 1.** List of oligos and thermal cycle conditions for genotyping PCR.

623

624 **Supplemental Table 2.** sgRNA target candidates for A3B.

625



**Figure 1**

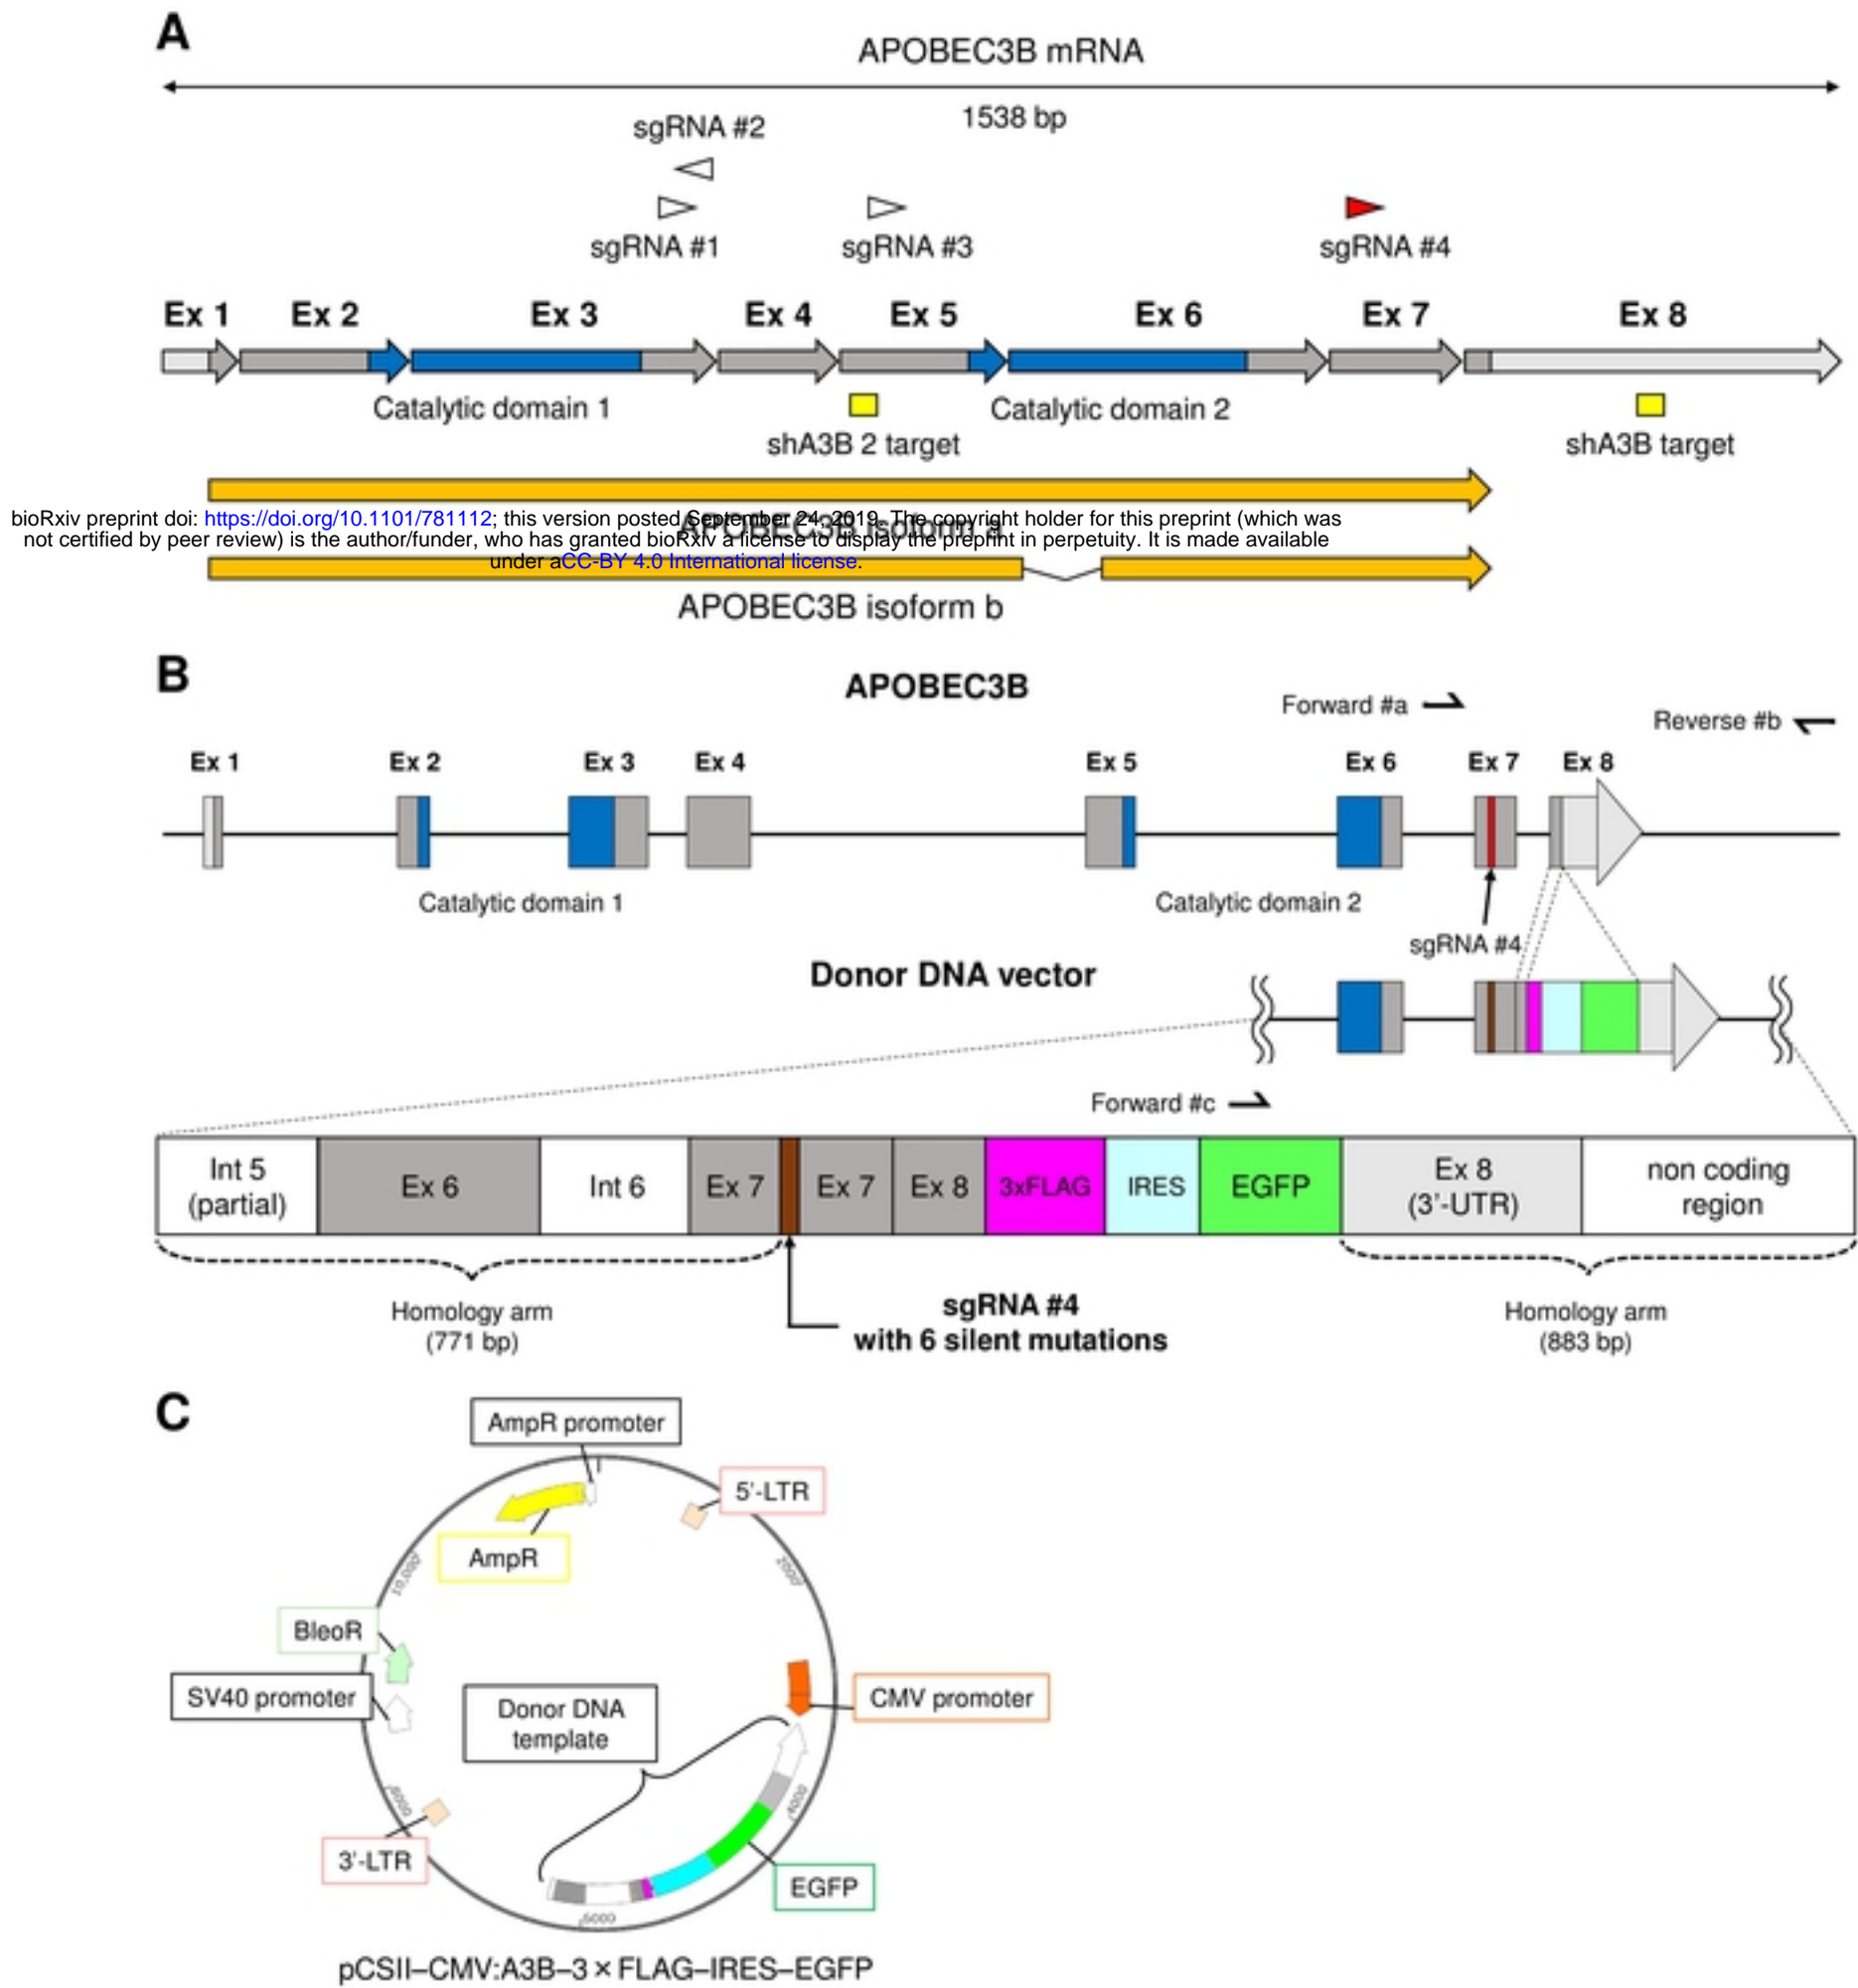

**Figure 2**

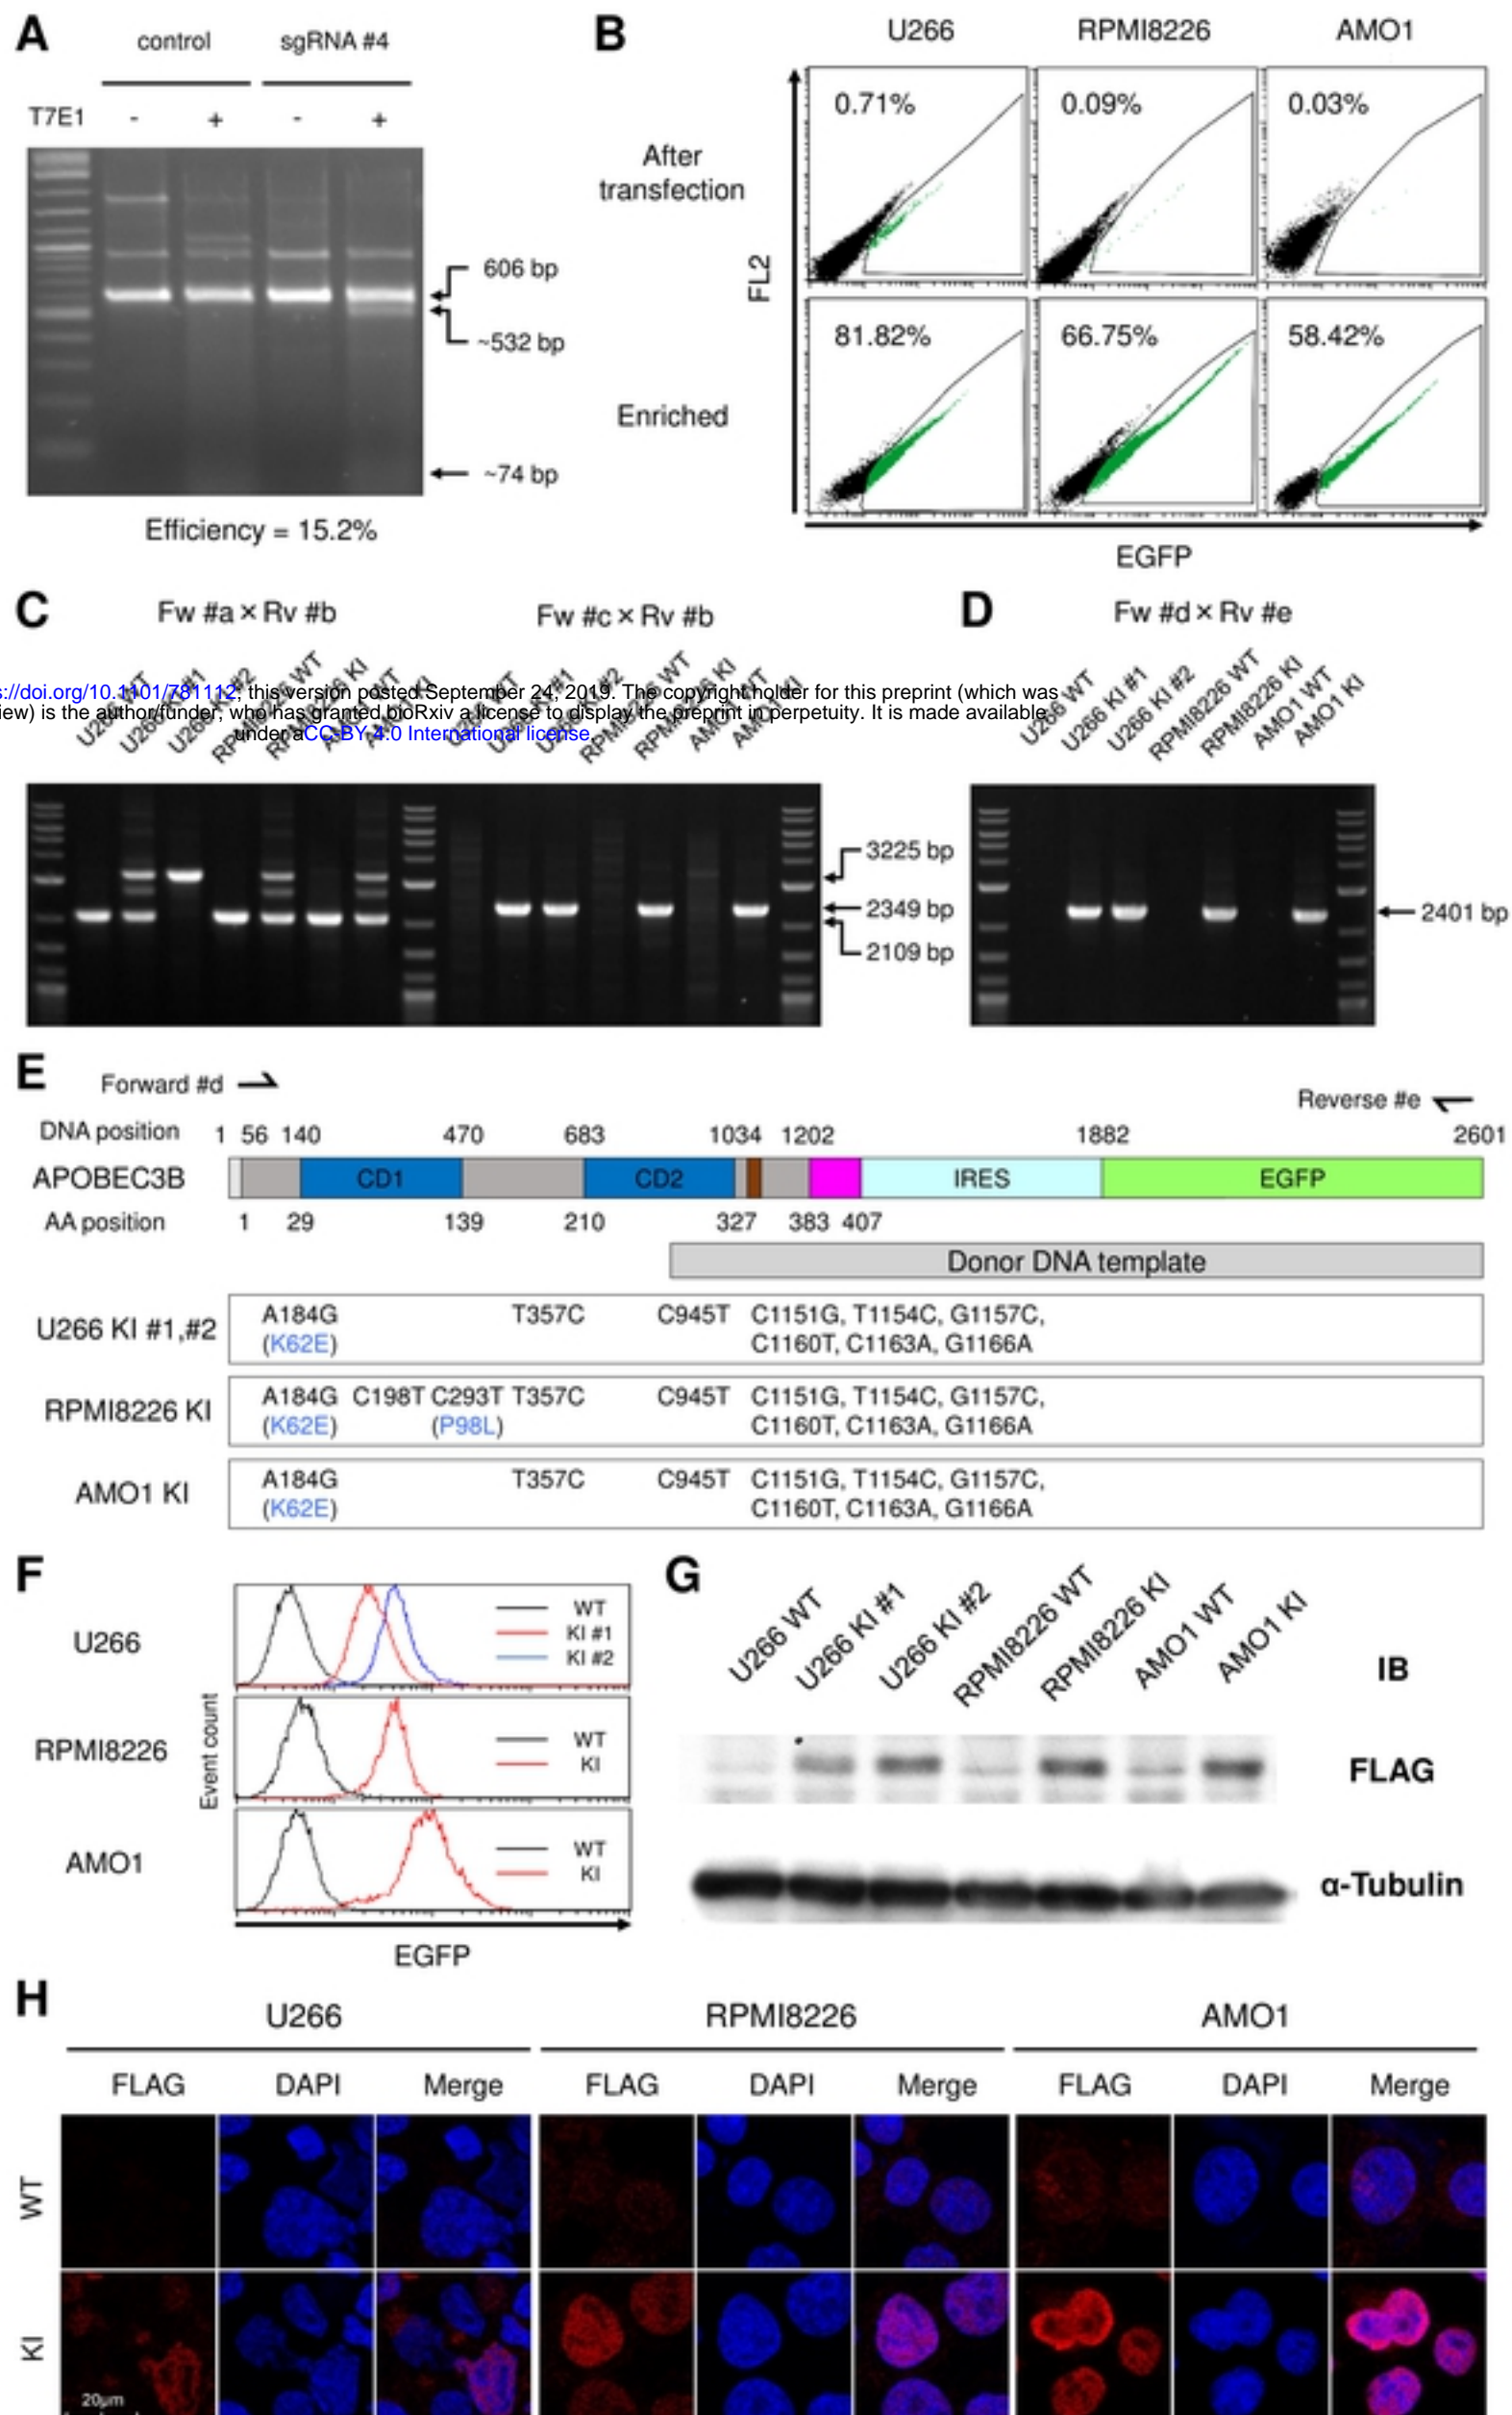

bioRxiv preprint doi: <https://doi.org/10.1101/781112>; this version posted September 24, 2019. The copyright holder for this preprint (which was not certified by peer review) is the author/funder, who has granted bioRxiv a license to display the preprint in perpetuity. It is made available under aCC-BY 4.0 International license.

**Figure 3**

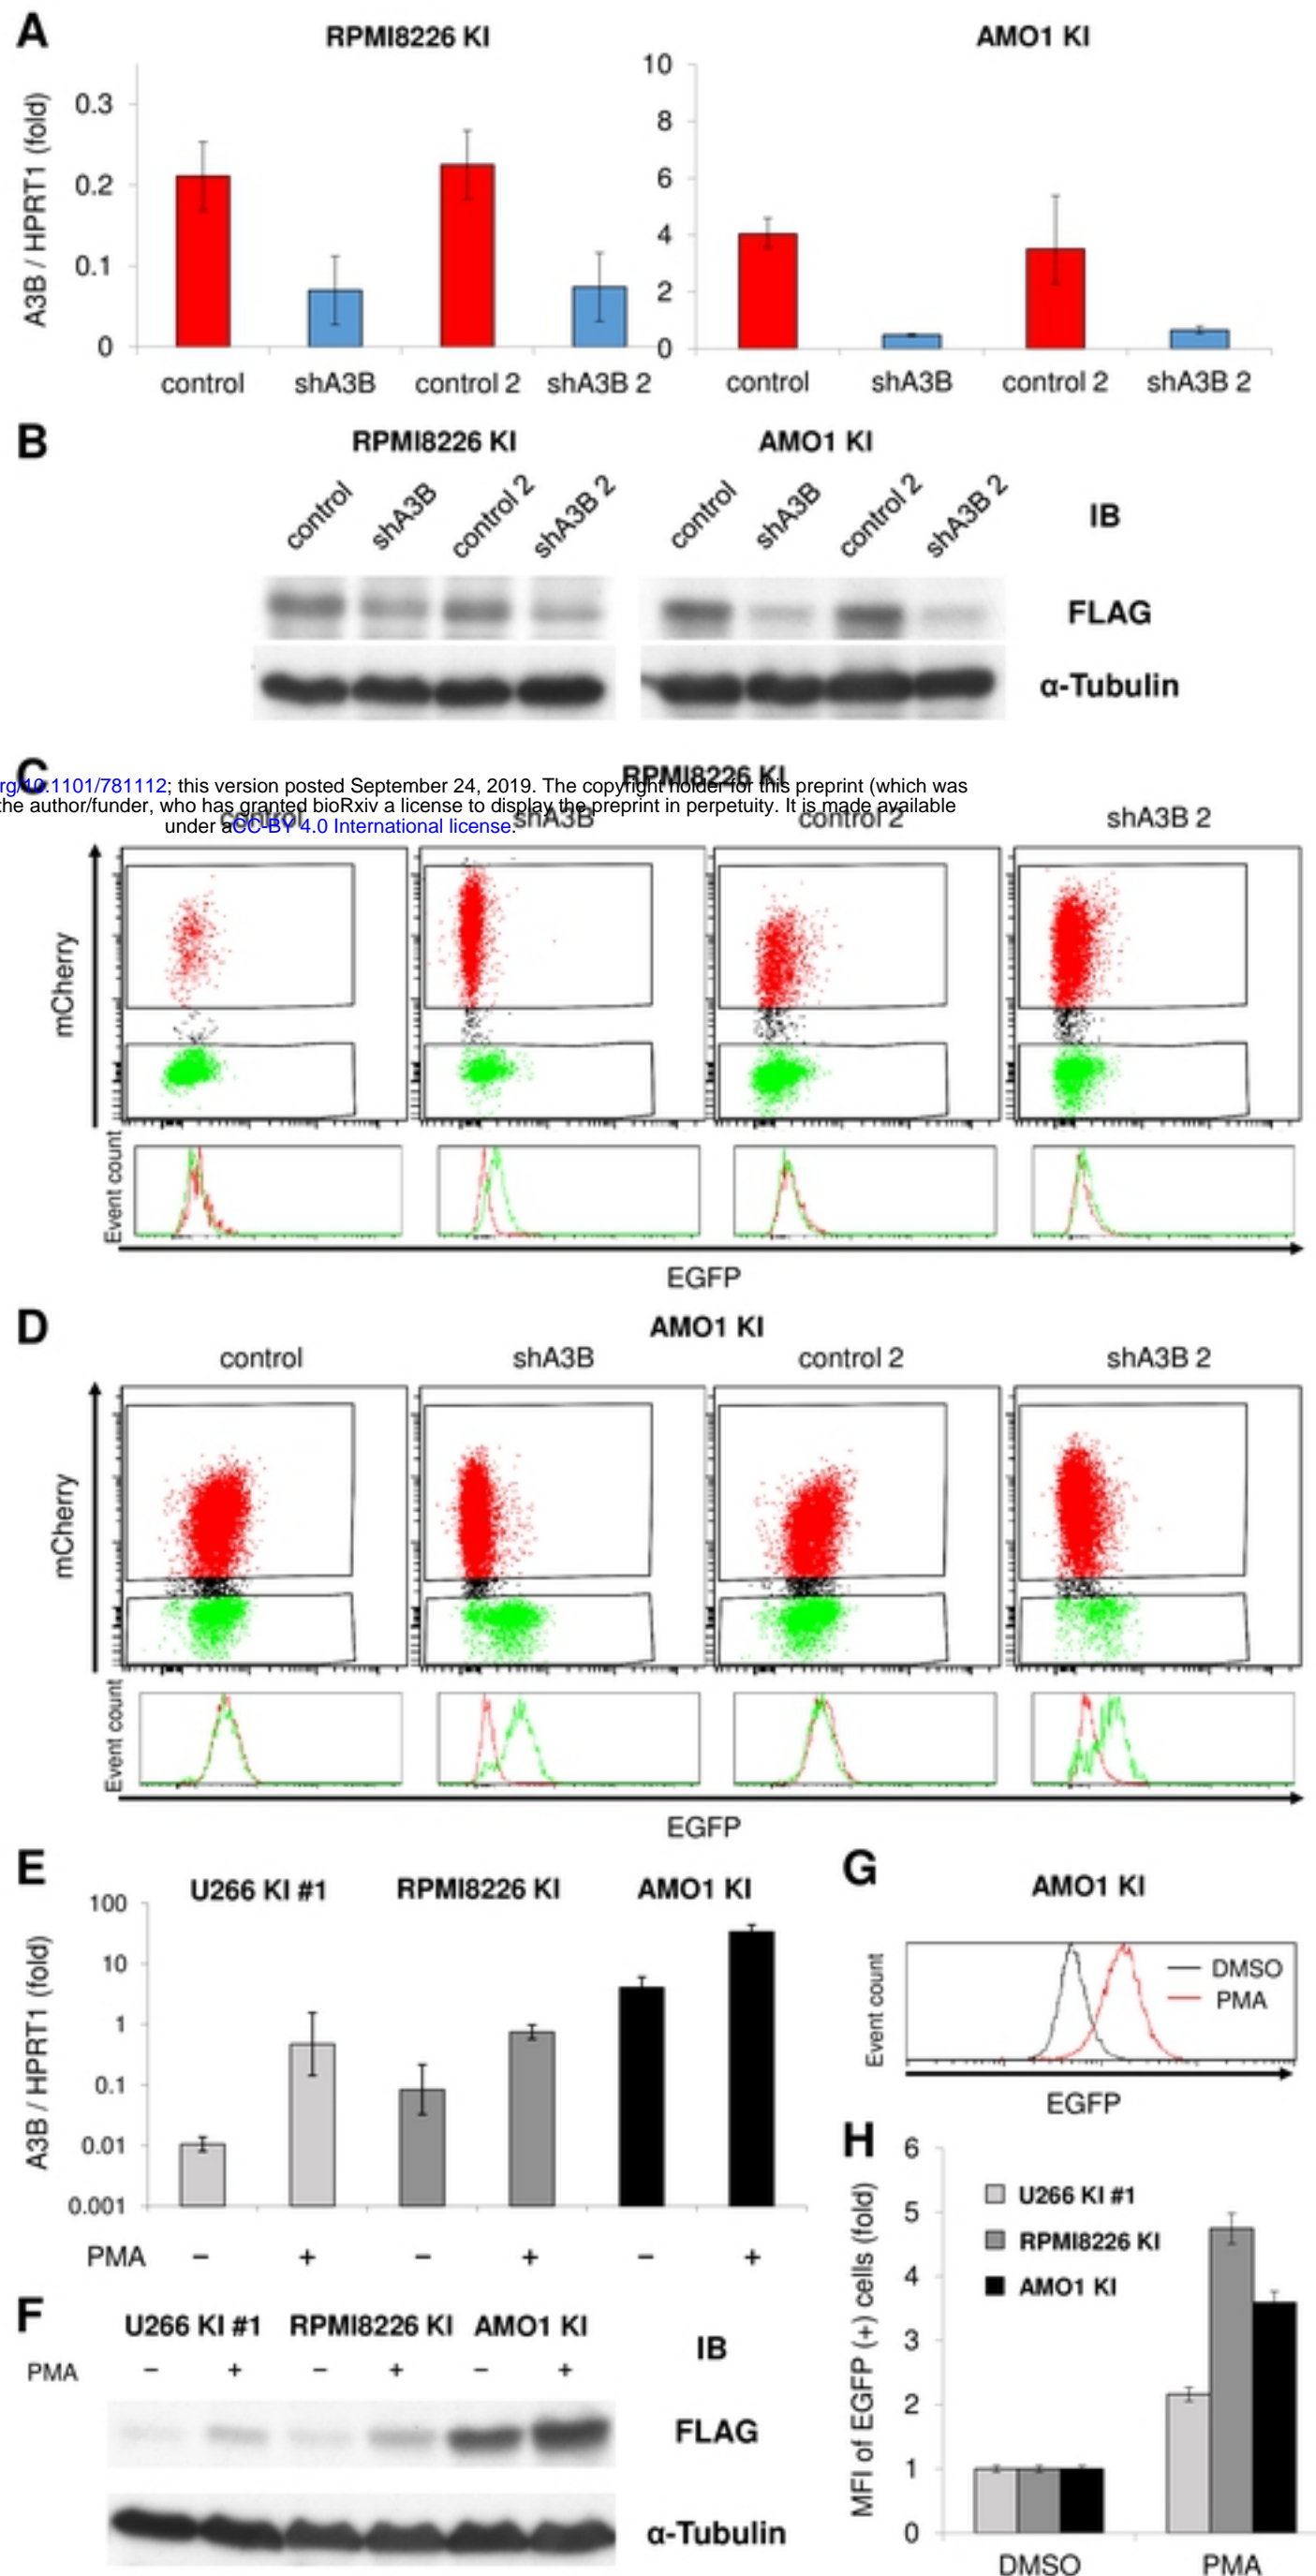

bioRxiv preprint doi: <https://doi.org/10.1101/781112>; this version posted September 24, 2019. The copyright holder for this preprint (which was not certified by peer review) is the author/funder, who has granted bioRxiv a license to display the preprint in perpetuity. It is made available under aCC-BY 4.0 International license.

**Figure 4**

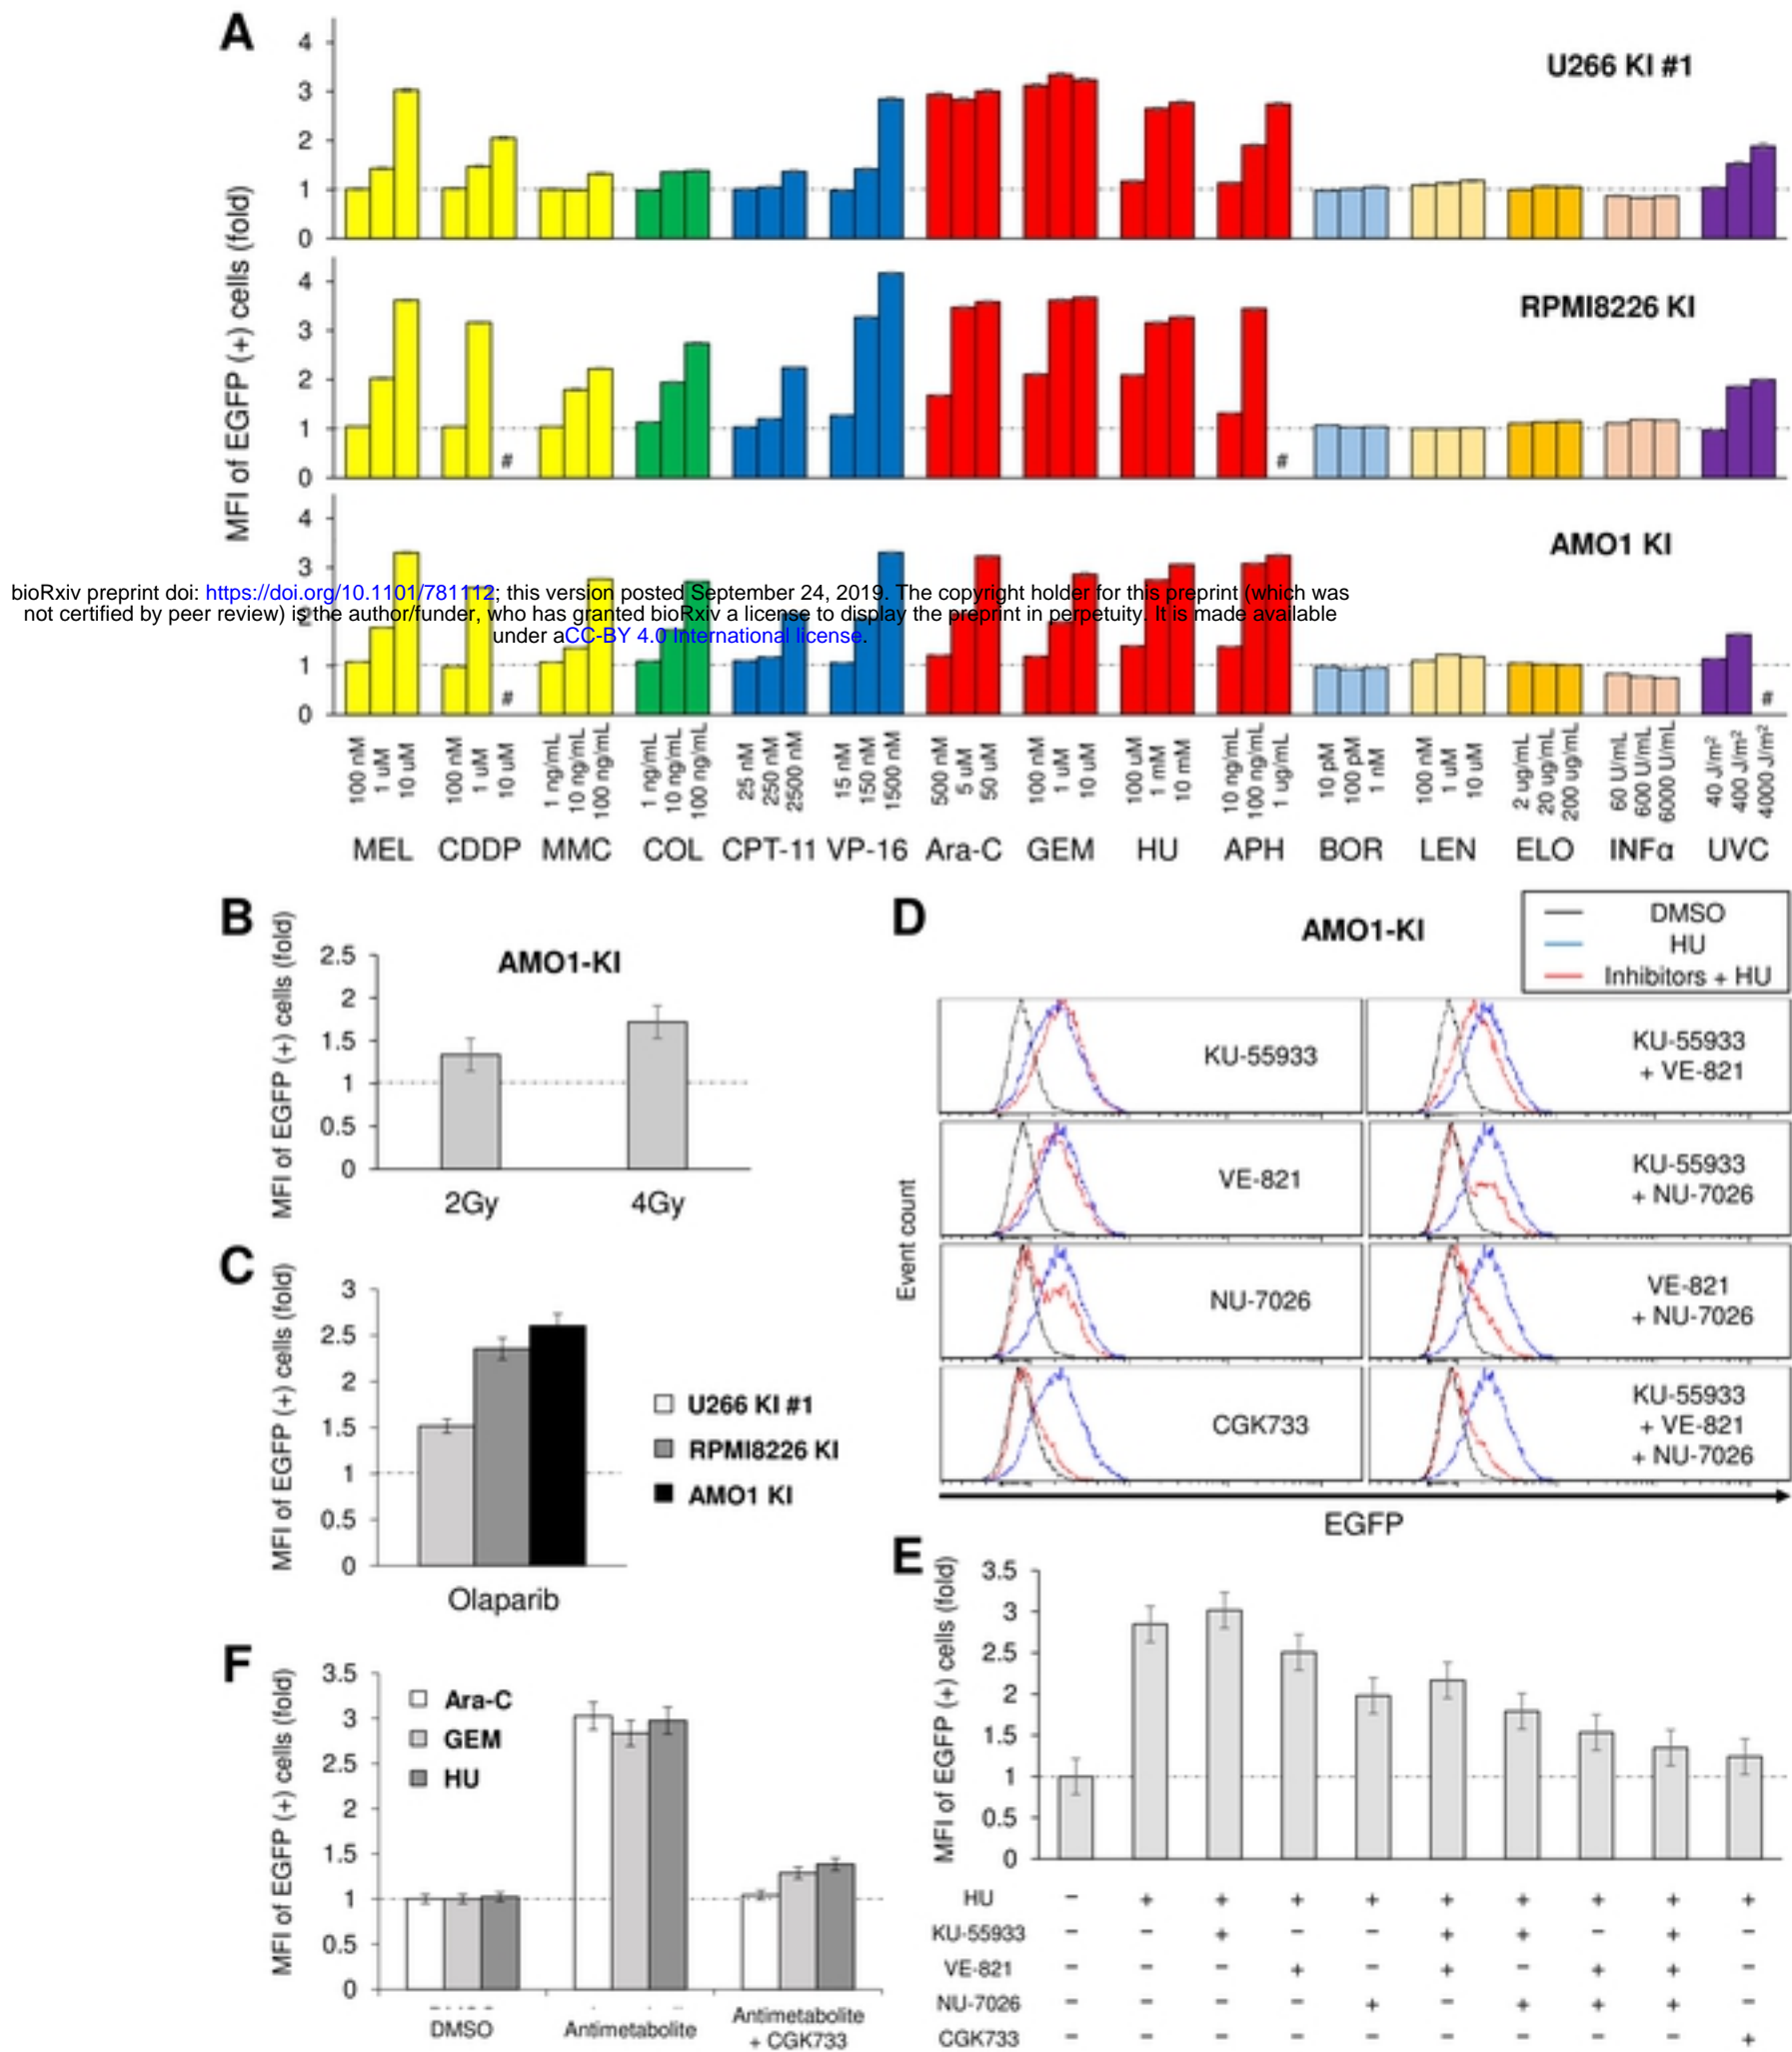

bioRxiv preprint doi: <https://doi.org/10.1101/781112>; this version posted September 24, 2019. The copyright holder for this preprint (which was not certified by peer review) is the author/funder, who has granted bioRxiv a license to display the preprint in perpetuity. It is made available under aCC-BY 4.0 International license.
